# Supplementary material for: Virological Findings and Treatment Outcomes of Cases That Developed Dolutegravir Resistance in Malawi’s National HIV Treatment Program
Source: MDPI journal article supplement (doi:10.3390/v16010029), 2023-12-23
Supplement: s1 [file s1]

**Table S1.** Standardized ART outcomes and viral load results of individuals with dolutegravir resistance

| Application year | Age | Sex    | DTG resistance score | Recommended regimen**     | Date implemented | Date last VL result | time recommendation to VL | VL result | ART outcome   | ART outcome date |
|------------------|-----|--------|----------------------|---------------------------|------------------|---------------------|---------------------------|-----------|---------------|------------------|
| 2021             | 40  | Male   | 60                   | TDF/3TC/DTG+DRV/r         | NI               | NA                  | NA                        | NA        | LTFU          | May-21           |
| 2021             | 42  | Male   | 30                   | TDF/3TC/DTG+DRV/r         | Jun-21           | Nov-22              | 12                        | LDL       | Alive in Care |                  |
| 2021             | 43  | Male   | 20                   | TDF/3TC/DTG+DTG           | NI               | Feb-22              | 13                        | 175,923*  | TO            | May-22           |
| 2021             | 43  | Female | 30                   | TDF/3TC/DTG + DTG + DRV/r | NI               | Jan-2023            | 14                        | <40       | Alive in care |                  |
| 2021             | 47  | Male   | 30                   | TDF/3TC/DTG + DTG + DRV/r | NI               | not drawn           | NA                        | NA        | Died          | Jun-22           |
| 2021             | 48  | Male   | 30                   | None                      | NA               | NA                  | NA                        | NA        | Died          | Jul-21           |
| 2021             | 14  | Male   | 30                   | TDF/3TC + ATV/r           | Jan-21           | June-2022           | 17                        | LDL       | Alive in Care |                  |
| 2021             | 40  | Male   | 40                   | TDF/3TC/DTG+DRV/r         | Nov-23           | May-2023            | 6                         | 1,562     | Alive in Care |                  |
| 2021             | 15  | Female | 30                   | TDF+3TC+DTG+DTG+DRV/r     | Jun-21           | Apr-22              | 9                         | 97        | Alive in Care |                  |
| 2021             | 20  | Male   | 40                   | TDF+3TC+DTG+DTG+DRV/r     | Sep-22           | not drawn           | NA                        | NA        | Died          | Dec-22           |
| 2021             | 41  | Male   | 105                  | TDF+3TC+DTG+DTG+DRV/r     | Nov-21           | Jul-22              | 13                        | 57        | Alive in Care |                  |
| 2021             | 62  | Female | 70                   | TDF+3TC+DTG+DTG+DRV/r     | NI               | Mar-2022            | unknown                   | 259,000   | Stopped ART   | Mar-22           |
| 2022             | 40  | Male   | 50                   | AZT/3TC+ATV/r             | Mar-23           | not drawn           | NA                        | NA        | Alive in care |                  |
| 2022             | 30  | Female | 85                   | TDF/3TC+ATV/r             | Sep-22           | Apr-23              | 8                         | LDL       | Alive in Care |                  |
| 2022             | 7   | Female | 15                   | ABC/3TC+DTG+DTG           | Sep-22           | Sep-23              | 12                        | <40       | Alive in Care |                  |
| 2022             | 21  | Female | 30                   | TDF/3TC/DTG+DRV           | Jan 2023         | Mar-23              | 3                         | <40       | Alive in Care |                  |
| 2022             | 55  | Male   | 60                   | TDF/3TC/DTG+DRV/r         | Sep-22           | not drawn           | NA                        | NA        | Died          | Apr-23           |
| 2022             | 46  | Male   | 60                   | TDF/3TC+ATV/r             | Sep-22           | Sep-23              | 12                        | <40       | Alive in Care |                  |
| 2022             | 17  | Male   | 80                   | TDF/3TC+ATV/r             | Mar-23           | not drawn           | NA                        | NA        | Alive in Care |                  |
| 2022             | 12  | Female | 30                   | ABC/3TC+DTG+DTG           | Mar-23           | not drawn           | NA                        | NA        | Alive in Care |                  |
| 2022             | 5   | Female | 30                   | ABC/3TC+DTG+DTG           | May-22           | Jun-23              | 13                        | 97        | Alive in Care |                  |
| 2022             | 63  | Male   | 30                   | AZT/3TC + ATV/r           | Feb-23           | not drawn           | NA                        | NA        | Alive in Care |                  |
| 2022             | 34  | Female | 110                  | 2NRTIs + DTG + DRV/r      | Jul-23           | not drawn           | NA                        | NA        | Alive in Care |                  |
| 2022             | 52  | Male   | 125                  | TDF/3TC + ATV/r           | Nov-22           | Feb-23              | 4                         | 265       | Alive in Care |                  |

\*Sample taken before treatment change. \*\* Recommended regimens were based on genotyping results and previous ART history. 10/24 cases had previous protease inhibitor exposure. At the start of dolutegravir-based ART, one case was ART naïve, 4 cases had 1 previous regimen, 10 had two previous regimens, 7 had three and 1 had four previous regimens.
